# Supplementary material
Source: PubMed Central journal article supplement (PMC3678409)
Supplement: supp_126.8.1744_JCS113613.pdf [file supp_126.8.1744_JCS113613.pdf]

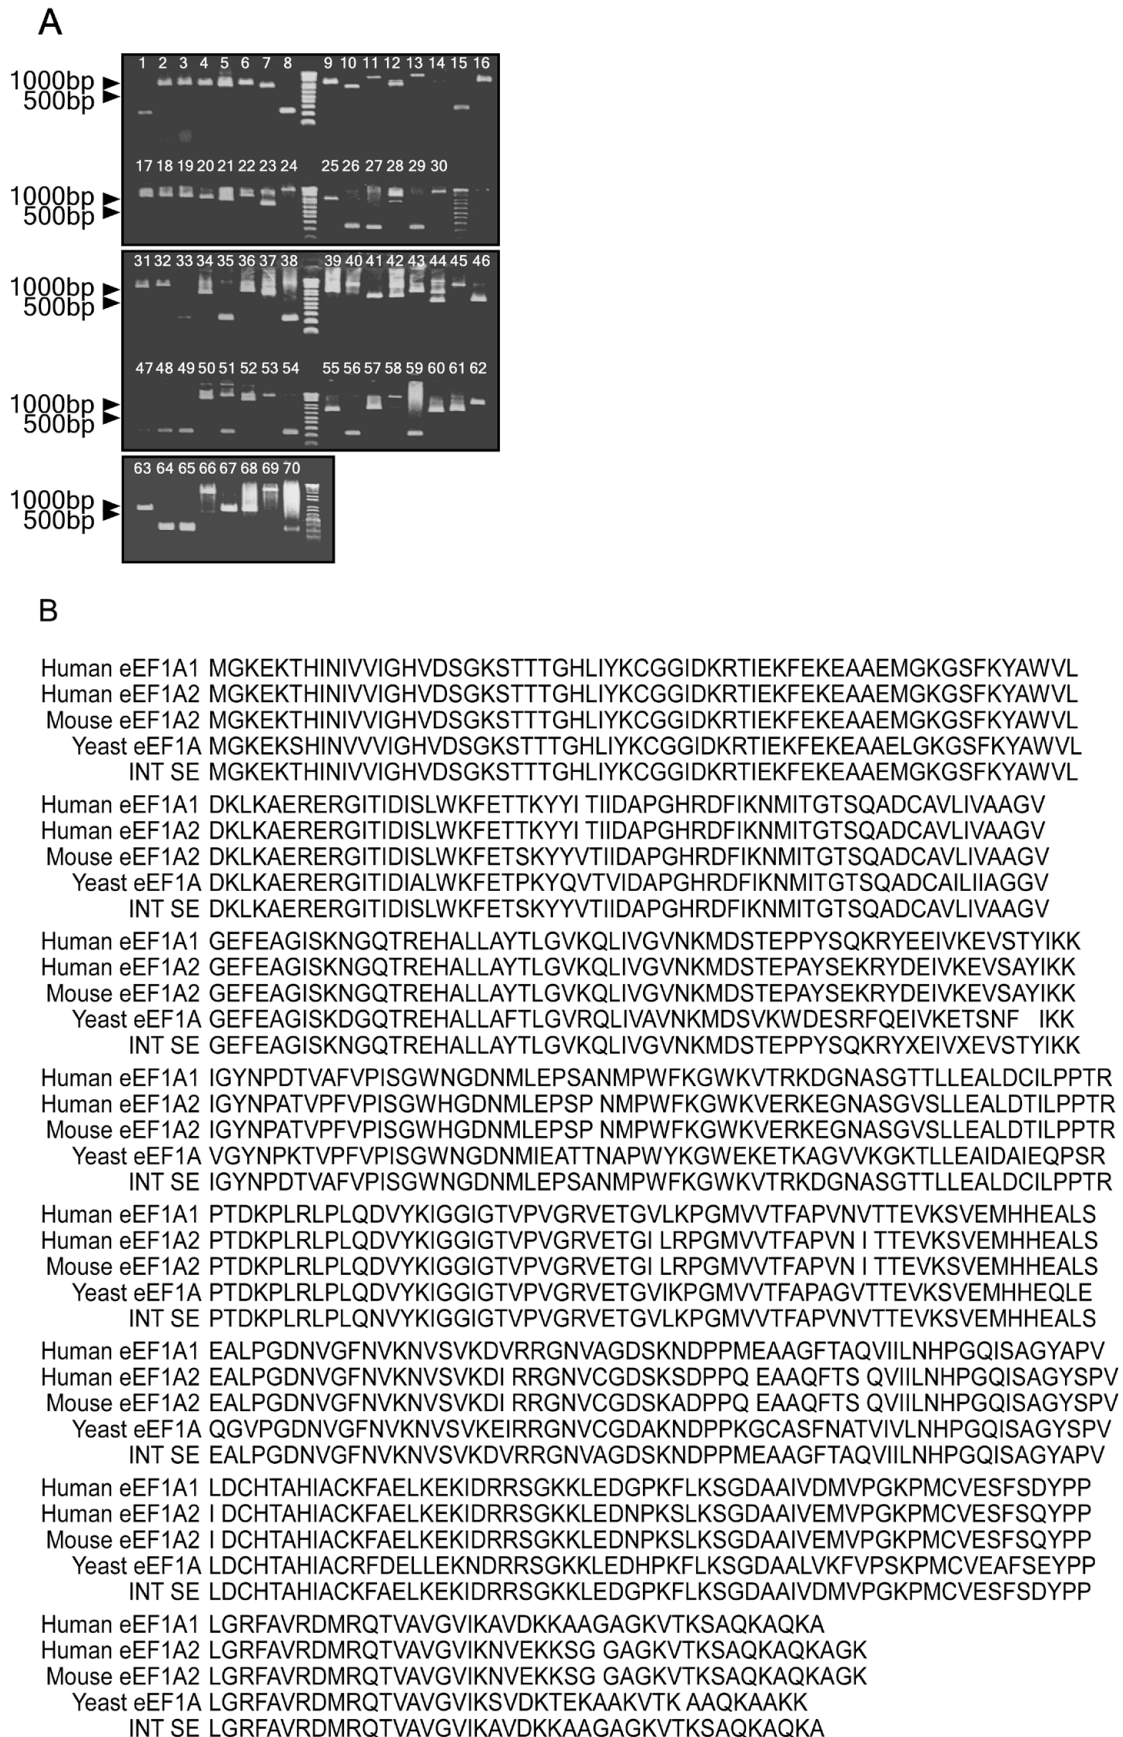

**Fig. S1. Candidate clones and sequence alignments.** (A) Approximately  $2.0 \times 10^6$  yeast transformants were screened and 70 primary candidates were identified as follows: Group I:  $>1000$  bp, 16 clones; Group II:  $\leq 1000$  bp ( $>500$  bp) 33 clones; Group III:  $<500$  bp, 21 clones. The corresponding prey plasmids were isolated and sequenced. (B) Amino acid sequence of eEF1A2 and INT SE shows 96% similarity. The candidate p16<sup>INK4a</sup> binding partners were then identified by NCBI BLAST searches of the nucleotide and protein databases.

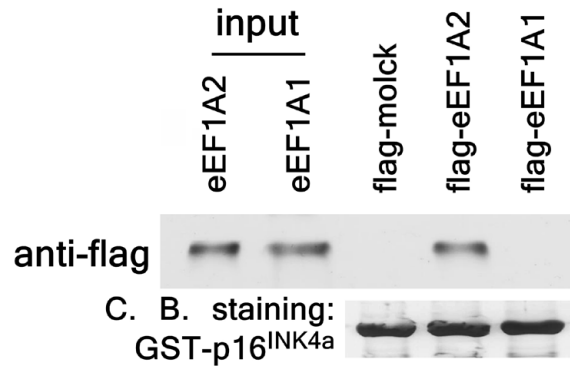

**Fig. S2. Interaction between p16<sup>INK4a</sup> and eEF1A2 or eEF1A1.** A Flag-tagged eEF1A2 or eEF1A1 full-length or mock plasmid was incubated with an equal amount of GST-p16<sup>INK4a</sup>. Bound proteins were analyzed by 12% SDS-PAGE and detected by western blotting.

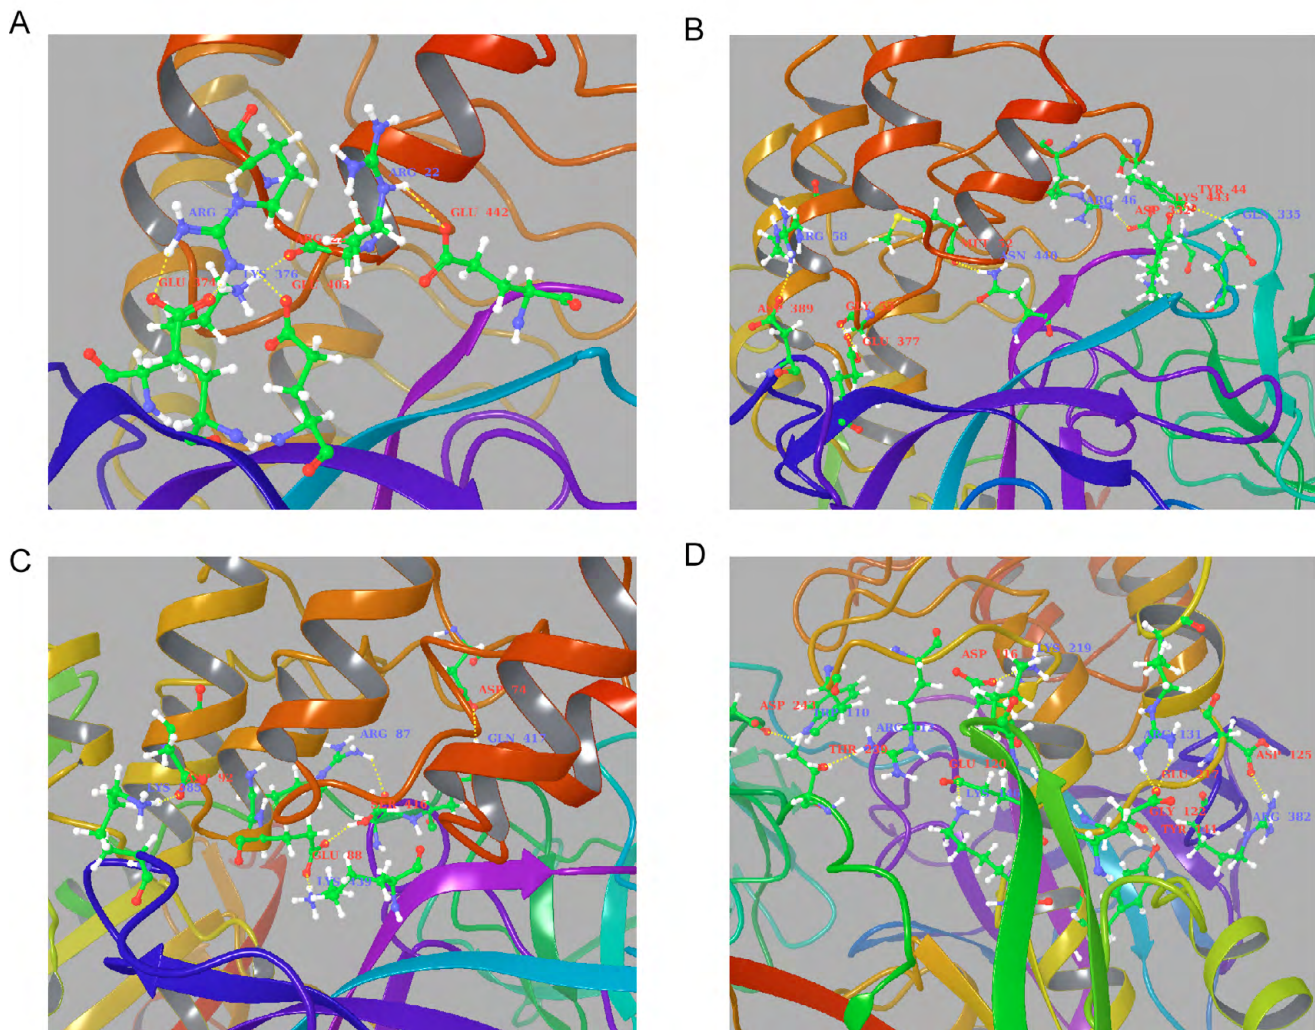

**Fig. S3. Hydrogen bonding between the interface residues in the computational model of the p16<sup>INK4a</sup>-eEF1A2 complex.** (A) Hydrogen bonds between the residues from the first ankyrin repeat of p16<sup>INK4a</sup> and those from Domain III of eEF1A2. (B) Hydrogen bonding between the residues from the second ankyrin repeat of p16<sup>INK4a</sup> and those from Domain III of eEF1A2. (C) Hydrogen bonding between the residues from the third ankyrin repeat of p16<sup>INK4a</sup> and those from Domain III of eEF1A2. (D) Hydrogen bonding between the residues from the fourth ankyrin repeat of p16<sup>INK4a</sup> and those from Domain I of eEF1A2 (with one exception of Arg382 from Domain III). These figures were generated using the Schrödinger Maestro software program.

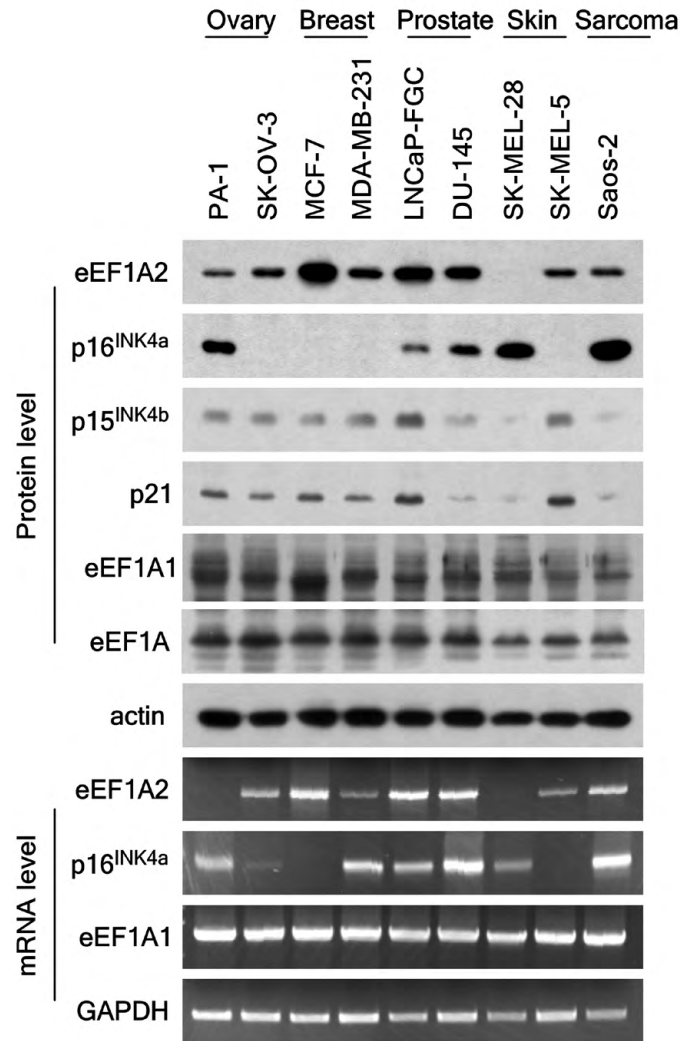

**Fig. S4. Expression of eEF1A2 and p16<sup>INK4a</sup> in cancer cell lines.** The seven upper panels show protein expression of eEF1A2 and p16<sup>INK4a</sup> and the four lower panels show mRNA levels of *eEF1A2* and *p16<sup>INK4a</sup>*.

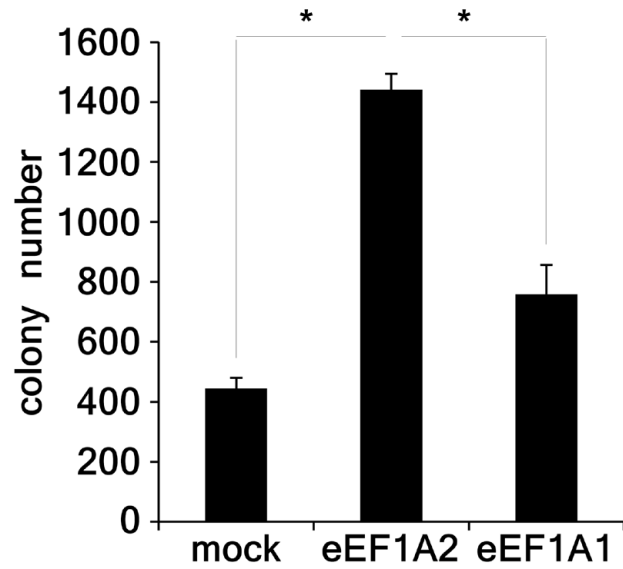

**Fig. S5. Anchorage-independent cell growth in NIH3T3 cells transfected with mock, eEF1A1 or eEF1A2.** Cells were stably transfected with mock, eEF1A1 or eEF1A2. Similar results were obtained from three independent experiments. Data are shown as means  $\pm$  s.d.. of 3 independent experiments and the asterisk (\*) indicates a significant difference ( $P < 0.01$ ).

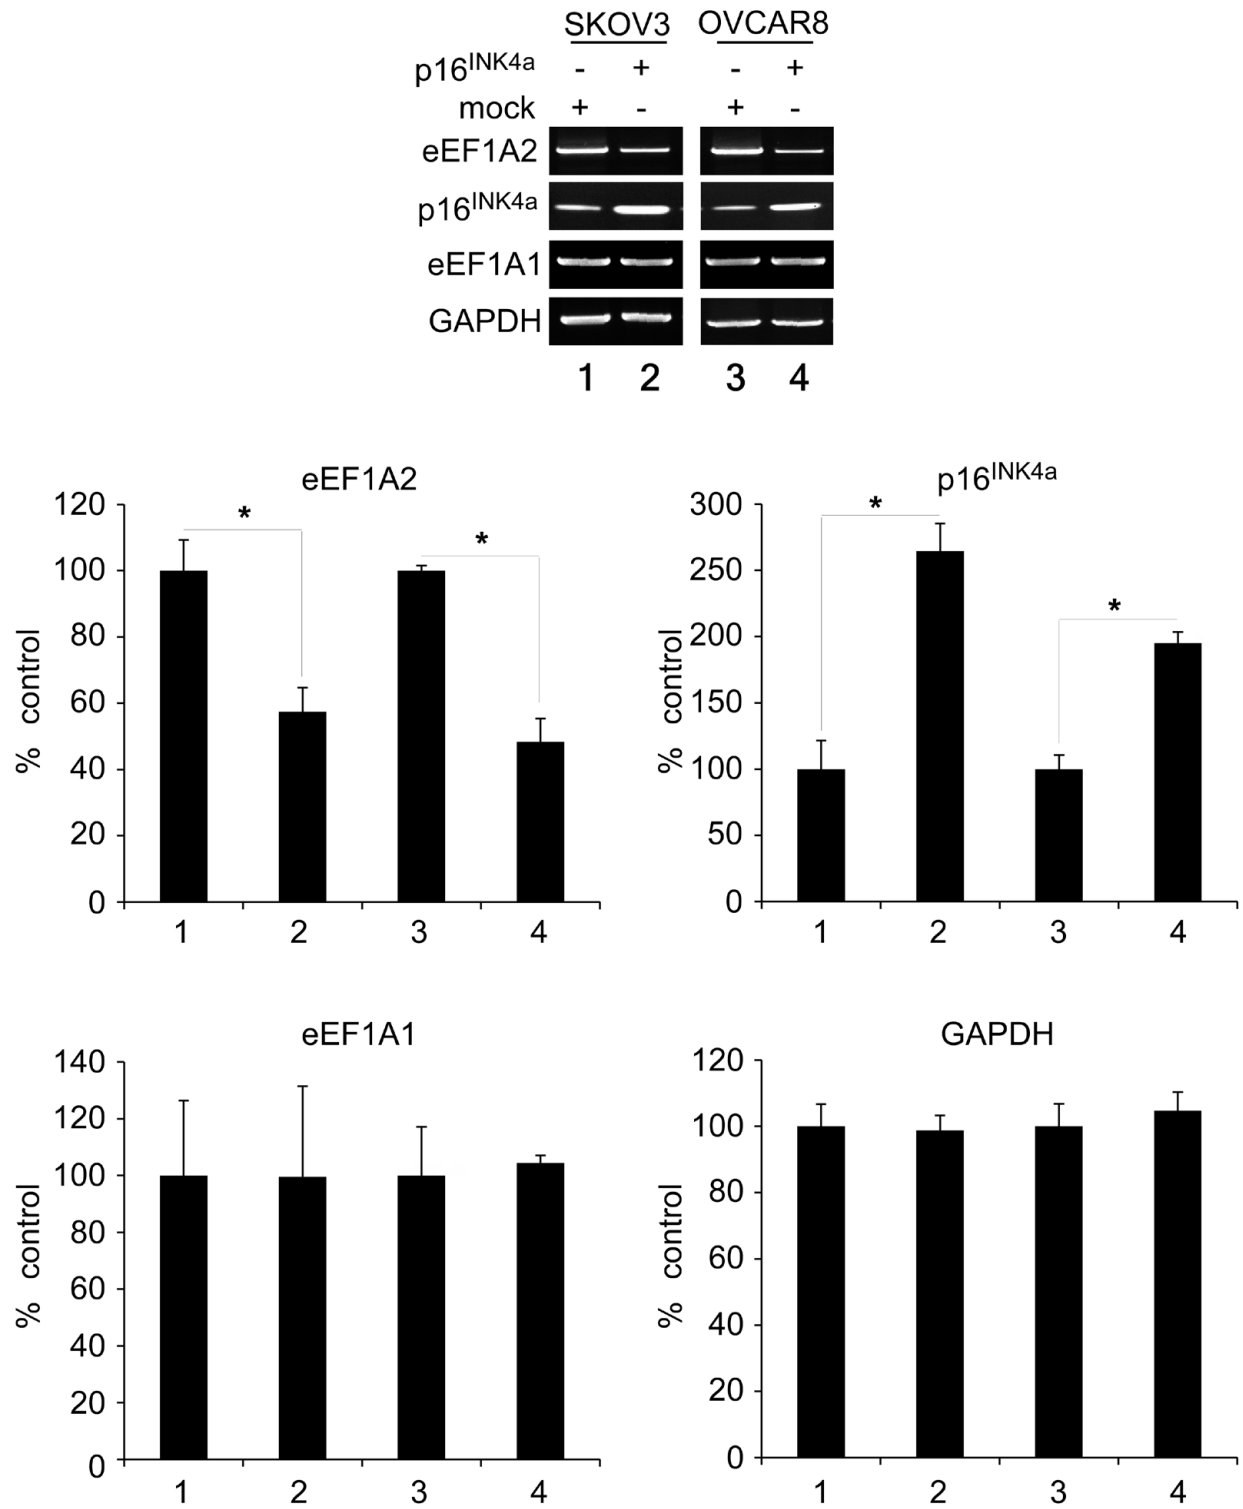

**Fig. S6. The mRNA levels of eEF1A2, eEF1A1 and p16<sup>INK4a</sup> in SKOV3 and OVCAR8 cells.** Cells were transfected with mock or p16<sup>INK4a</sup> and harvested after 48 h for preparing total RNAs. mRNA expression of *eEF1A2*, *eEF1A1* and *p16<sup>INK4a</sup>* were analyzed by reverse transcriptase-PCR. Similar results were obtained from three independent experiments. Data are shown as means  $\pm$  s.d. of 3 independent experiments and the asterisk (\*) indicates a significant difference ( $P < 0.01$ ).

**Table S1. Hydrogen bonds in the computational model of the p16<sup>INK4a</sup>-eEF1A2 complex**

| Element (Atom-H)                   | Element (Atom-A)                  | Distance<br>( $<2.5$ Å) | DHA angle<br>( $>120^\circ$ ) | HAB angle<br>( $>90^\circ$ ) |
|------------------------------------|-----------------------------------|-------------------------|-------------------------------|------------------------------|
| eEF1A2(III): Lys376-3HZ            | P16(1 <sup>st</sup> ): Arg22-O    | 1.666                   | 150.6                         | 162.3                        |
| P16(1 <sup>st</sup> ): Arg22-HE    | eEF1A2(III):Glu442-OE2            | 2.322                   | 126.4                         | 140.8                        |
| P16(1 <sup>st</sup> ): Arg24-1HH1  | eEF1A2(III):Glu374-OE1            | 1.535                   | 154.2                         | 102.1                        |
| P16(1 <sup>st</sup> ): Arg24-2HH2  | eEF1A2(III):Glu374-OE2            | 1.907                   | 157.8                         | 107.1                        |
| P16(1 <sup>st</sup> ): Arg24-2HH1  | eEF1A2(III):Glu403-OE2            | 1.686                   | 150.7                         | 139.3                        |
| eEF1A2(III): Gln335-2HE2           | P16(2 <sup>nd</sup> ): Tyr44-OH   | 2.356                   | 157.1                         | 96.9                         |
| P16(2 <sup>nd</sup> ): Tyr44-HH    | eEF1A2(III): Lys443-O             | 2.008                   | 143.8                         | 121.3                        |
| P16(2 <sup>nd</sup> ): Arg46-1HH2  | eEF1A2(III):Asp332-OD1            | 1.698                   | 173.9                         | 109.4                        |
| eEF1A2(III):Asn440-1HD2            | P16(2 <sup>nd</sup> ):Met52-O     | 1.732                   | 166.8                         | 107.5                        |
| eEF1A2(III): Glu377-HE2            | P16(2 <sup>nd</sup> ):Gly55-O     | 2.038                   | 161.9                         | 113.1                        |
| P16(2 <sup>nd</sup> ): Arg58-2HH1  | eEF1A2(III): Asp389-OD2           | 1.812                   | 155.3                         | 162.5                        |
| eEF1A2(III): Gln417-2HE2           | P16(3 <sup>rd</sup> ): Asp74-OD2  | 1.954                   | 139.4                         | 144.9                        |
| P16(3 <sup>rd</sup> ): Arg87-1HH1  | eEF1A2(III): Ser416-O             | 2.499                   | 130.0                         | 120.9                        |
| eEF1A2(III): Ser416-HG             | P16(3 <sup>rd</sup> ): Glu88-OE1  | 1.739                   | 155.5                         | 119.8                        |
| eEF1A2(III): Lys439-1HZ            | P16(3 <sup>rd</sup> ): Glu88-OE2  | 1.530                   | 176.1                         | 119.3                        |
| eEF1A2(III): Lys385-1HZ            | P16(3 <sup>rd</sup> ): Asp92-OD2  | 1.492                   | 169.8                         | 144.6                        |
| P16(4 <sup>th</sup> ): Trp110-HE1  | eEF1A2(I): Asp243-OD2             | 1.966                   | 136.1                         | 103.6                        |
| P16(4 <sup>th</sup> ): Arg112-1HH1 | eEF1A2(I): Thr239-OG1             | 1.914                   | 163.5                         | 130.1                        |
| eEF1A2(I): Lys219-3HZ              | P16(4 <sup>th</sup> ): Asp116-OD1 | 1.608                   | 172.3                         | 157.4                        |
| eEF1A2(I): Lys146-2HZ              | P16(4 <sup>th</sup> ): Glu120-OE1 | 1.447                   | 171.2                         | 121.6                        |

|                                    |                                    |       |       |       |
|------------------------------------|------------------------------------|-------|-------|-------|
| eEF1A2(I): Tyr141-HH               | P16(4 <sup>th</sup> ): Gly122-O    | 1.690 | 166.4 | 127.1 |
| eEF1A2(III): Arg382-1HH1           | P16(4 <sup>th</sup> ): Asp125(OD1) | 1.790 | 150.8 | 140.4 |
| P16(4 <sup>th</sup> ): Arg131-1HH1 | eEF1A2(I): Glu217-OE2              | 1.868 | 145.4 | 102.7 |
| P16(4 <sup>th</sup> ): Arg131-2HH2 | eEF1A2(I): Glu217-OE2              | 1.714 | 151.5 | 143.9 |

The ankyrin repeats of p16<sup>INK4a</sup> and domains of eEF1A2 are also labeled in the table below.

The hydrogen bonds are defined by default when the following distances and angle cut-offs were satisfied: 2.5 Å for H-A distance; D-H-A angle greater than 120°; and H-A-B angle greater than 90° where H is the hydrogen, A is the acceptor, D is the donor, and B is a neighbor atom bonded to the acceptor.

Note: HH is the hydrogen of the phenolic hydroxyl group of tyrosine. 2HE2 is one hydrogen in the amide side chain group of glutamine; HE2 is one carboxylic hydrogen of glutamic acid; 1HZ, 2HZ and 3HZ are the three hydrogens in the ε-ammonium group of lysine; 1HH1, 1HH2, 2HH2, 2HH1 and HE are the five hydrogens in the guanidinium side chain of arginine; O is the oxygen in the backbone amide group; OE1, OE2 are the two carboxylic oxygens of glutamic acid; OD1 and OD2 are the two carboxylate oxygens of aspartic acid.
